# Supplementary material for: Plants under Stress: Involvement of Auxin and Cytokinin
Source: Int J Mol Sci. 2017 Jul 4;18(7):1427. doi: 10.3390/ijms18071427 (PMC5535918; doi:10.3390/ijms18071427)
Supplement: Supplementary file 1 [file ijms-18-01427-s001.xlsx]

## Sheet: Sheet1
Supplementary table S1: Summary of genetic studies from the published literature aiming to uncover the role of auxin and cytokinin in abiotic stress response.
	FUNCTION	SPECIES	GENE PRODUCT	GENE EXPRESSION	MUTANTS/OVEREXPRESSORS	MUTANT/OVEREXPRESSOR STRESS PHENOTYPE	REFERENCES
	Cytokinin signaling	Arabidopsis thaliana	AHK1	induced by dehydration	AHK1 overexpressor	tolerant to drought stress	150
		Arabidopsis thaliana	AHK2	downregulated by salt			107
		Arabidopsis thaliana	AHK2	induced by dehydration	ahk2	increased survival to drought after rewatering, increased survival upon salt stress	150, 152
		Arabidopsis thaliana	AHK2	not responsive to cold	ahk2	enhanced dehydration tolerance	152, 159
		Arabidopsis thaliana	AHK2		ahk2-2	hypersensitive to salt stress in terms of root growth and fresh weight	151
		Arabidopsis thaliana	AHK3	induced by hydration, high salinity and cold (3-week-old plants)	ahk3	drought and salinity tolerant	150
		Arabidopsis thaliana	AHK3	not responsive to cold (11-day-old seedlings)	ahk3	enhanced dehydration tolerance	152, 159
		Arabidopsis thaliana	AHK3		ahk3-3	increased root elongation after transfer to low water potential media	151
		Arabidopsis thaliana	AHK2 AHK3		ahk2 ahk3	more tolerant to drought and salt than single	150
		Arabidopsis thaliana	AHK2 AHK3		ahk2 ahk3	enhanced freezing tolerance	152
		Arabidopsis thaliana	AHK3 AHK4		ahk3 ahk4	enhanced freezing tolerance	152
		Arabidopsis thaliana	AHK2 AHK3		ahk2 ahk3	enhanced dehydration tolerance	159
		Arabidopsis thaliana	AHK4	induced by dehydration			150
		Oryza sativa	OsAHP1		OsAHP-RNAi	hypersensitive to salt treatment but resistant to osmotic stress	162
		Arabidopsis thaliana	AHP2	downregulated by dehydration	ahp2 ahp3 ahp5	strong drought-tolerant phenotype	161
		Oryza sativa	OsAHP2		OsAHP-RNAi	hypersensitive to salt treatment but resistant to osmotic stress	162
		Arabidopsis thaliana	AHP3	downregulated by dehydration	ahp2 ahp3 ahp5	strong drought-tolerant phenotype	161
		Arabidopsis thaliana	AHP5	downregulated by dehydration	ahp2 ahp3 ahp5	strong drought-tolerant phenotype	161
					ahp2 ahp3 ahp5	reduced type A ARR expression in response to cold	153
		Arabidopsis thaliana	ARR1		35S:ARR1	hypersensitive cold response of type A ARRs as well as enhanced freezing tolerance	153
		Arabidopsis thaliana	ARR1		arr1	reduced cold-responsive expression of type A ARRs	153
		Arabidopsis thaliana	ARR5	induced by cold, salinity and dehidration			144, 154
		Arabidopsis thaliana	ARR6	induced by cold, salinity and dehidration			144
		Arabidopsis thaliana	ARR7	induced by cold, salinity and dehidration	35S:ARR7	hypersensitive response to freezing temperatures	144, 152
		Arabidopsis thaliana	ARR8	downregulated by heat stress			80
		Arabidopsis thaliana	ARR9	weak and early induction by cold, downregulated by heat			80, 144
		Arabidopsis thaliana	ARR10	downregulated by heat stress			80
		Arabidopsis thaliana	ARR12	downregulated by heat stress	arr1 arr12	less sensitive to salt stress	80, 163
		Arabidopsis thaliana	ARR15	induced by cold, salinity and dehidration			144, 154
		Arabidopsis thaliana	ARR22	weak and late induction by cold, induced by drought			144, 154
	Cytokinin homeostasis
		Arabidopsis thaliana	UGT76C2	downregulated by osmotic stress and drought stresses	35S:UGT76C2	tolerant to drought stress as adult plants	99
		Arabidopsis thaliana	UGT76C2		ugt76c2	more sensitive to drought stress	99
	Cytokinin biosynthesis
		Solanum lycopersicum	SlIPT3	strongly repressed in roots by salt stress	35S:SlIPT3	improved tolerance to salinity	71
		Arabidopsis thaliana	IPT3		ipt3		71
		Solanum lycopersicum	SlIPT4	strongly repressed in roots by salt stress			71
		Arabidopsis thaliana	IPT8		ER:IPT8, estradiol-inducible	reduce plant’s tolerance in salt and osmotic stress	70
		Arabidopsis thaliana	IPT1 IPT3 IPT5 IPT7		ipt1 ipt3 ipt5 ipt7	increased resistance to salt stress, drought stress	58
		Arabidopsis thaliana	CKX1		bGLU:CKX1 in barley	increased resistce to drought stress	59
		Oryza sativa	OsCKX2		OsCKX2-RNAi	increased resistce to salinity stress	76
		Oryza sativa	OsLOG	downregulated by cold, drought and salt stress			74
		Oryza sativa	OsCYP735A	induced by cold and dehydration			73
	Cytokinin response
		Solanum lycopersicum	SlCRF1	induced by cold in leaves and roots, repressed by heat in roots			165
		Solanum lycopersicum	SlCRF1	slightly reduced in leaves and strongly decreased in roots by drought			165
		Solanum lycopersicum	SlCRF2	induced by H2O2 treatment only in roots			165
		Arabidopsis thaliana	CRF4	strongly induced in both root and shoot tissues by cold	35S:CRF4	tolerant to cold treatment	168
		Arabidopsis thaliana	CRF4		crf4	sensitive to freezing	168
		Arabidopsis thaliana	CRF6	induced by heat shock, salt and oxidative (H2O2) stress			167
	Auxin homeostasis
		Crocus sativus	CsUGT85U1		35S:CsUGT85U1 in Arabidopsis plants	enhanced salt and oxidative stress tolerance	88
		Arabidopsis thaliana	UGT74E2	induced by photorespiration and H2O2-inducing conditions			87
		Arabidopsis thaliana	UGT74E2	induced by oxidative, osmotic, salt, and dehydration stress	35S::UGT74E2	enhanced drought and salt stress tolerance	72
		Arabidopsis thaliana	AtGH3-5	induced by drought, salt, cold stress	wes1-D	resistant to cold, drought and salt	91
		Arabidopsis thaliana	AtGH3-5		wes1	sensitive to cold, drought and salt	91
		Oryza sativa	OsGH3.13	induced by drought	tld1-D	drought tolerant	93
		Oryza sativa	OsGH3-12	induced by drought and suppressed by cold	35S:OsGH3-2	hypersensitive to drought stress, increased cold tolerance	90
		Cicer arietinum	CaGH3-1	induced in root under desiccation and salinity			95
		Cicer arietinum	CaGH3-1	highly induced under drought and salt stress			95
		Cicer arietinum	CaGH3-7	induced in root by salinity			95
		Cicer arietinum	CaGH3-8	induced in root and shoot by salinity			95
		Cicer arietinum	CaGH3-9	induced in root under desiccation, cold and salinity stresses			95
		Cicer arietinum	CaGH3-5	induced in shoot under desiccation, salt and cold stresses			95
		Cicer arietinum	CaGH3-6	induced in root under desiccation, cold and salinity stresses			95
		Cicer arietinum	CaGH3-10	induced by salt stress in root			95
		Cicer arietinum	CaGH3-4	induced in root and shoot under salt stress			95
		Cicer arietinum	CaGH3-12	induced in root and shoot by salinity			95
		Medicago truncatula	MtGH3-7	induced by drought in root			95
		Medicago truncatula	MtGH3-8	induced under salt stress in root			95
		Medicago truncatula	MtGH3-9	induced by drought and salinity			95
		Zea mays	ZmGH3-1	reduced in shoot and induced in root by PEG			96
		Zea mays	ZmGH3-2	reduced in shoot and induced in root by PEG			96
		Zea mays	ZmGH3-3	reduced in shoot and induced in root by PEG. Induced in root by salt stress			96
		Zea mays	ZmGH3-4	reduced in shoot and induced in root by PEG			96
		Zea mays	ZmGH3-5	reduced in shoot and induced in root by PEG. Induced in root by salt stress			96
		Zea mays	ZmGH3-6	reduced in shoot and induced in root by PEG. Induced in root by salt stress			96
		Zea mays	ZmGH3-7	reduced in shoot and induced in root by PEG. Induced in root and shoot by salt stress			96
		Zea mays	ZmGH3-8	reduced in shoot and induced in root by PEG			96
		Zea mays	ZmGH3-9	reduced in shoot and induced in root by PEG			96
		Zea mays	ZmGH3-10	reduced in shoot and induced in root by PEG			96
		Zea mays	ZmGH3-11	induced by NaCl and reduced by PEG in shoot			96
		Zea mays	ZmGH3-12	reduced by PEG in shoot			96
		Zea mays	ZmGH3-13	reduced in shoot and induced in root by PEG			96
		Sorghum bicolor	SbGH3-13	induced under salt and drought treatment			137
	Auxin biosynthesis
		Arabidopsis thaliana	YUC2	suppressed by high temperature			38
		Arabidopsis thaliana	YUC6	suppressed by high temperature	yuc6-3	increased sensitivity to water deficiency	38, 39
		Arabidopsis thaliana	YUC6		35S:YUC6	increased water withdrawal tolerance	39
		Arabidopsis thaliana	YUC6		yuc6-1D	increased water withdrawal tolerance	39
		Arabidopsis thaliana	YUC6		yuc6-2D	increased water withdrawal tolerance	39
		Arabidopsis thaliana	YUC6		SWPA2:YUC6 in poplar plants	enhanced tolerance to drought and oxidative stress	40
		Solanum tuberosum	StYUC6		35S:YUC6 in potato plants	enhanced drought tolerance	36, 34
		Arabidopsis thaliana	YUC7	induced by drought primarily in the roots	yuc7-1D	enhanced drought tolerance	35
		Arabidopsis thaliana	YUC9	induced by drought	35S:YUC7	enhanced drought tolerance	35
		Arabidopsis thaliana	YUC10	induced by drought			35
		Arabidopsis thaliana	YUC11	induced by drought			35
	Auxin signaling
		Arabidopsis thaliana	TIR1	downregulated by oxidative stress			132
		Arabidopsis thaliana	TIR1 AFB2		tir1 afb2	increased tolerance against salinity	134
		Arabidopsis thaliana	AFB1	downregulated by oxidative stress			132
		Arabidopsis thaliana	AFB3	downregulated by oxidative stress			132
		Arabidopsis thaliana	AFB5	downregulated by oxidative stress			132
		Populus trichocarpa	PtrFLB1		35S:PtrFLB1	increased susceptibility under drought stress	131
		Oryza sativa	OsIAA6		PGD1:OsIAA6	increased drought tolerance	138
		Sorghum bicolor	SbIAA3	induced in leaf and root by salt			137
		Sorghum bicolor	SbIAA2	induced in root by salt			137
		Sorghum bicolor	SbIAA18	induced in root by salt			137
		Sorghum bicolor	SbIAA6	induced expression in root by salt, in leaf by drought			137
		Sorghum bicolor	SbIAA1	induced under drought and salt stress			137
		Sorghum bicolor	SbIAA26	induced expression in leaf and root by salt, in root by drought			137
		Sorghum bicolor	SbIAA10	induced expression in leaf and root by salt			137
		Sorghum bicolor	SbIAA24	induced expression in leaf and root by salt			137
		Sorghum bicolor	SbIAA16	induced expression in leaf by salt			137
		Sorghum bicolor	SbIAA19	induced expression in leaf by salt			137
		Sorghum bicolor	SbIAA11	induced expression in leaf by salt and drought			137
		Arabidopsis thaliana	IAA17	salt stress stabilizes IAA17 protein level			109
		Sorghum bicolor	SbLBD32	induced under under salt and drought stress			137
		Sorghum bicolor	SbARF10	induced in root by salinity			137
		Sorghum bicolor	SbARF16	induced in root by salinity			137
		Sorghum bicolor	SbARF21	induced in root by salinity			137
		Oryza sativa	OsARF11	drought responsive			136
		Oryza sativa	OsARF15	drought responsive			136
		Glycine max	GmARF33	drought responsive			135
		Glycine max	GmARF50	drought responsive			135
	Auxin transport
		Zea mays	ZmABCB1	downregulated by salt in root, upregulated by salt in shoot			111
		Zea mays	ZmABCB2	downregulated by salt in root, upregulated by salt in shoot			111
		Zea mays	ZmABCB3	downregulated by salt in root, upregulated by salt in shoot			111
		Zea mays	ZmABCB4	downregulated by salt in root, upregulated by salt in shoot			111
		Zea mays	ZmABCB5	downregulated by salt in root, upregulated by salt in shoot			111
		Zea mays	ZmABCB6	downregulated by salt in root, upregulated by salt in shoot			111
		Zea mays	ZmABCB7	downregulated by salt in root, upregulated by salt in shoot			111
		Zea mays	ZmABCB8	downregulated by salt in root, upregulated by salt in shoot			111
		Zea mays	ZmABCB9	downregulated by salt in root, upregulated by salt in shoot			111
		Zea mays	ZmABCB10	downregulated by salt in root, upregulated by salt in shoot			111
		Zea mays	ZmABCB11	downregulated by salt in root, upregulated by salt in shoot			111
		Zea mays	ZmABCB12	downregulated by salt in root, upregulated by salt in shoot			111
		Zea mays	ZmABCB13	downregulated by salt in root, upregulated by salt in shoot			111
		Zea mays	ZmABCB14	downregulated by salt in root, upregulated by salt in shoot			111
		Zea mays	ZmABCB15	downregulated by salt in root, upregulated by salt in shoot			111
		Zea mays	ZmABCB16	downregulated by salt in root, upregulated by salt in shoot			111
		Zea mays	ZmABCB17	downregulated by salt in root, upregulated by salt in shoot			111
		Zea mays	ZmABCB18	downregulated by salt in root, upregulated by salt in shoot			111
		Zea mays	ZmABCB19	downregulated by salt in root, upregulated by salt in shoot			111
		Zea mays	ZmABCB20	downregulated by salt in root, upregulated by salt in shoot			111
		Zea mays	ZmABCB21	downregulated by salt in root, upregulated by salt in shoot			111
		Zea mays	ZmABCB22	downregulated by salt in root, upregulated by salt in shoot			111
		Zea mays	ZmABCB23	downregulated by salt in root, upregulated by salt in shoot			111
		Zea mays	ZmABCB24	downregulated by salt in root, upregulated by salt in shoot			111
		Zea mays	ZmABCB25	slightly upregulated by salt in root, upregulated by salt in shoot			111
		Zea mays	ZmABCB26	slightly upregulated by salt in root, upregulated by salt in shoot			111
		Zea mays	ZmABCB27	downregulated by salt in root, upregulated by salt in shoot			111
		Zea mays	ZmABCB28	downregulated by salt in root, upregulated by salt in shoot			111
		Zea mays	ZmABCB29	downregulated by salt in root, upregulated by salt in shoot			111
		Zea mays	ZmABCB30	downregulated by salt in root, upregulated by salt in shoot			111
		Zea mays	ZmABCB31	downregulated by salt in root, upregulated by salt in shoot			111
		Zea mays	ZmABCB32	downregulated by salt in root, upregulated by salt in shoot			111
		Zea mays	ZmABCB33	downregulated by salt in root, upregulated by salt in shoot			111
		Zea mays	ZmABCB34	downregulated by salt in root, upregulated by salt in shoot			111
		Zea mays	ZmABCB35	downregulated by salt in root, upregulated by salt in shoot			111
		Zea mays	ZmLAX1	downregulated by salt in root, upregulated by salt in shoot			111
		Zea mays	ZmLAX2	upregulated by salt in root, upregulated by salt in shoot			111
		Zea mays	ZmLAX3	downregulated by salt in root, upregulated by salt in shoot			111
		Zea mays	ZmLAX4	downregulated by salt in root, upregulated by salt in shoot			111
		Arabidopsis thaliana	PIN1	reduced by salt stress in 7-day-old seedlings	pin1	decreased reduction in root meristem length and cell number under salt stress as compared to wild type	109
		Arabidopsis thaliana	PIN1	induced by salt stress in roots of 21-day-old seedlings			108
		Arabidopsis thaliana	PIN2	induced expression by salt stress			110
		Arabidopsis thaliana	PIN3	reduced by salt stress in 7-day-old seedlings			109
		Arabidopsis thaliana	PIN3	induced by salt stress in roots of 21-day-old seedlings			108
		Arabidopsis thaliana	PIN3	upregulated by mannitol treatment			97
		Arabidopsis thaliana	PIN7	reduced by salt stress in 7-day-old seedlings			109
		Arabidopsis thaliana	PIN7	induced by salt stress in roots of 21-day-old seedlings			108
		Arabidopsis thaliana	PIN1 PIN3 PIN7		pin1 pin3 pin7	more tolerant to salt stress than pin1 in terms of reducing root meristem length and cell number	109
